# Supplementary material
Source: PubMed Central journal article supplement (PMC6350926)
Supplement: NIHMS1001804-supplement-Table_1.pdf [file NIHMS1001804-supplement-Table_1.pdf]

| Name of Material/ Equipment                        | Company                                   | Catalog Number | Comments/Description                                     |
|----------------------------------------------------|-------------------------------------------|----------------|----------------------------------------------------------|
| Clicks/EHAA media                                  | Irvine Scientific                         | 9195           |                                                          |
| Collagenase IV                                     | Worthington<br>Biochemical<br>corporation | LS004188       |                                                          |
| DNase I                                            | Worthington<br>Biochemical<br>corporation | LS002145       | Deoxyribonuclease 1                                      |
| OptiPrep                                           | Sigma Aldrich                             | D1556          | Density Gradient Medium                                  |
| V450 anti mouse CD146(clone ME-9F1                 | BD biosciences                            | 562232         |                                                          |
| FITC anti mouse CD146 (clone ME-9F1                | Biolegend                                 | 134706         | Fluorescein isothiocyanate (FITC)                        |
| Pacific Blue anti mouse CD31(clone 390)            | Biolegend                                 | 102422         |                                                          |
| PerCp/Cy5.5 anti mouse CD31(clone 390)             | Biolegend                                 | 102420         | Peridinin-chlorophyll proteins-Cyanine 5.5 (PerCP-Cy5.5) |
| APC anti mouse PDPN (clone 8.1.1)                  | Biolegend                                 | 127410         | Allophycocyanin (APC), podoplanin (PDPN)                 |
| APC/Cy7 anti mouse CD45 (clone 30-F11)             | Biolegend                                 | 103116         |                                                          |
| Brilliant Violet 510 anti mouse CD45 (clone 30-F11 | Biolegend                                 | 103138         |                                                          |
| FITC anti mouse CD16/32 (clone 93)                 | Biolegend                                 | 101306         | Fluorescein isothiocyanate (FITC)                        |
| PerCp/Cy5.5 anti mouse CD16/32(clone 93)           | Biolegend                                 | 101324         | Peridinin-chlorophyll proteins-Cyanine 5.5 (PerCP-Cy5.5) |
| ghost red 780 viability dye                        | TONBO biosceinces                         | 3-0865-T100    |                                                          |
| APC syrian hamster IgG (clone SHG-1)               | Biolegened                                | 402102         |                                                          |
| PerCp/Cy5.5 rat IgG2a (clone RTK2758)              | Biolegend                                 | 400531         |                                                          |
| FITC rat IgG2 (clone eBR2a)                        | ebioscience                               | 1-4321-80      |                                                          |
| Anti mouse LYVE1 (clone 223322)                    | R&D systems                               | FAB2125A       |                                                          |
| BSA (fraction V)                                   | Fischer                                   | BP1600-100     | Bovine Serum Albumin (BSA)                               |

|                                     |                     |             |                                                                                   |
|-------------------------------------|---------------------|-------------|-----------------------------------------------------------------------------------|
| EDTA                                | VWR                 | E177        | Ethylenediaminetetraacetic acid (EDTA) -for RBC lysis buffer                      |
| Ammonium Chloride                   | Fischer             | A687-500    | for RBC Lysis buffer                                                              |
| Potassium Bicarbonate               | Fischer             | P184-500    | for RBC Lysis buffer                                                              |
| Scalpel                             | Feather             | 2975#21     |                                                                                   |
| 100um cell strainer                 | Fischer             | 22363549    |                                                                                   |
| 2.4G2                               | in house/ATCC       | ATCC HB-197 | FC block to inhibit non-specific binding to Fc gamma + cells -made from hybridoma |
| Phosphate Buffered Saline (PBS)     | Corning             | 21-040-CV   |                                                                                   |
| Hanks Balanced Salt Solution (HBSS) | Gibco               | 14185-052   |                                                                                   |
| Fetal Bovine Serum (FBS)            | Atlanta biologicals | S11550      |                                                                                   |
| 96 well plate                       | Corning             |             | 3788                                                                              |
| 6 well plate                        | Corning             |             | 3506                                                                              |
| 50 ml conical                       | Truline             | TR2004      |                                                                                   |
| 15 ml conical                       | Falcon              |             | 352196                                                                            |
| 1 ml Pipete tip                     | USA scientific      | 1111-2721   |                                                                                   |
| 200 µl pipete tip                   | USA scientific      | 1110-1700   |                                                                                   |
| 10 µl pipete tip                    | USA scientific      | 1111-3700   |                                                                                   |
| seriological 10ml pipete            | greiner bio-one     |             | 607107                                                                            |
| seriological 5ml pipete             | greiner bio-one     |             | 606107                                                                            |
| Cell incubator                      | Fischer             |             | Heracell 160i                                                                     |
| BD FacsCanto II flow cytometer      | BD biosciences      |             |                                                                                   |
| Clinical Centrifuge                 | Beckman coulter     |             | model X-14R                                                                       |
